# Supplementary material for: Luhong Formula Has a Cardioprotective Effect on Left Ventricular Remodeling in Pressure‐Overloaded Rats
Source: Hindawi journal article supplement (doi:10.1155/2020/4095967), 2020-01-01

# Graphical Abstract

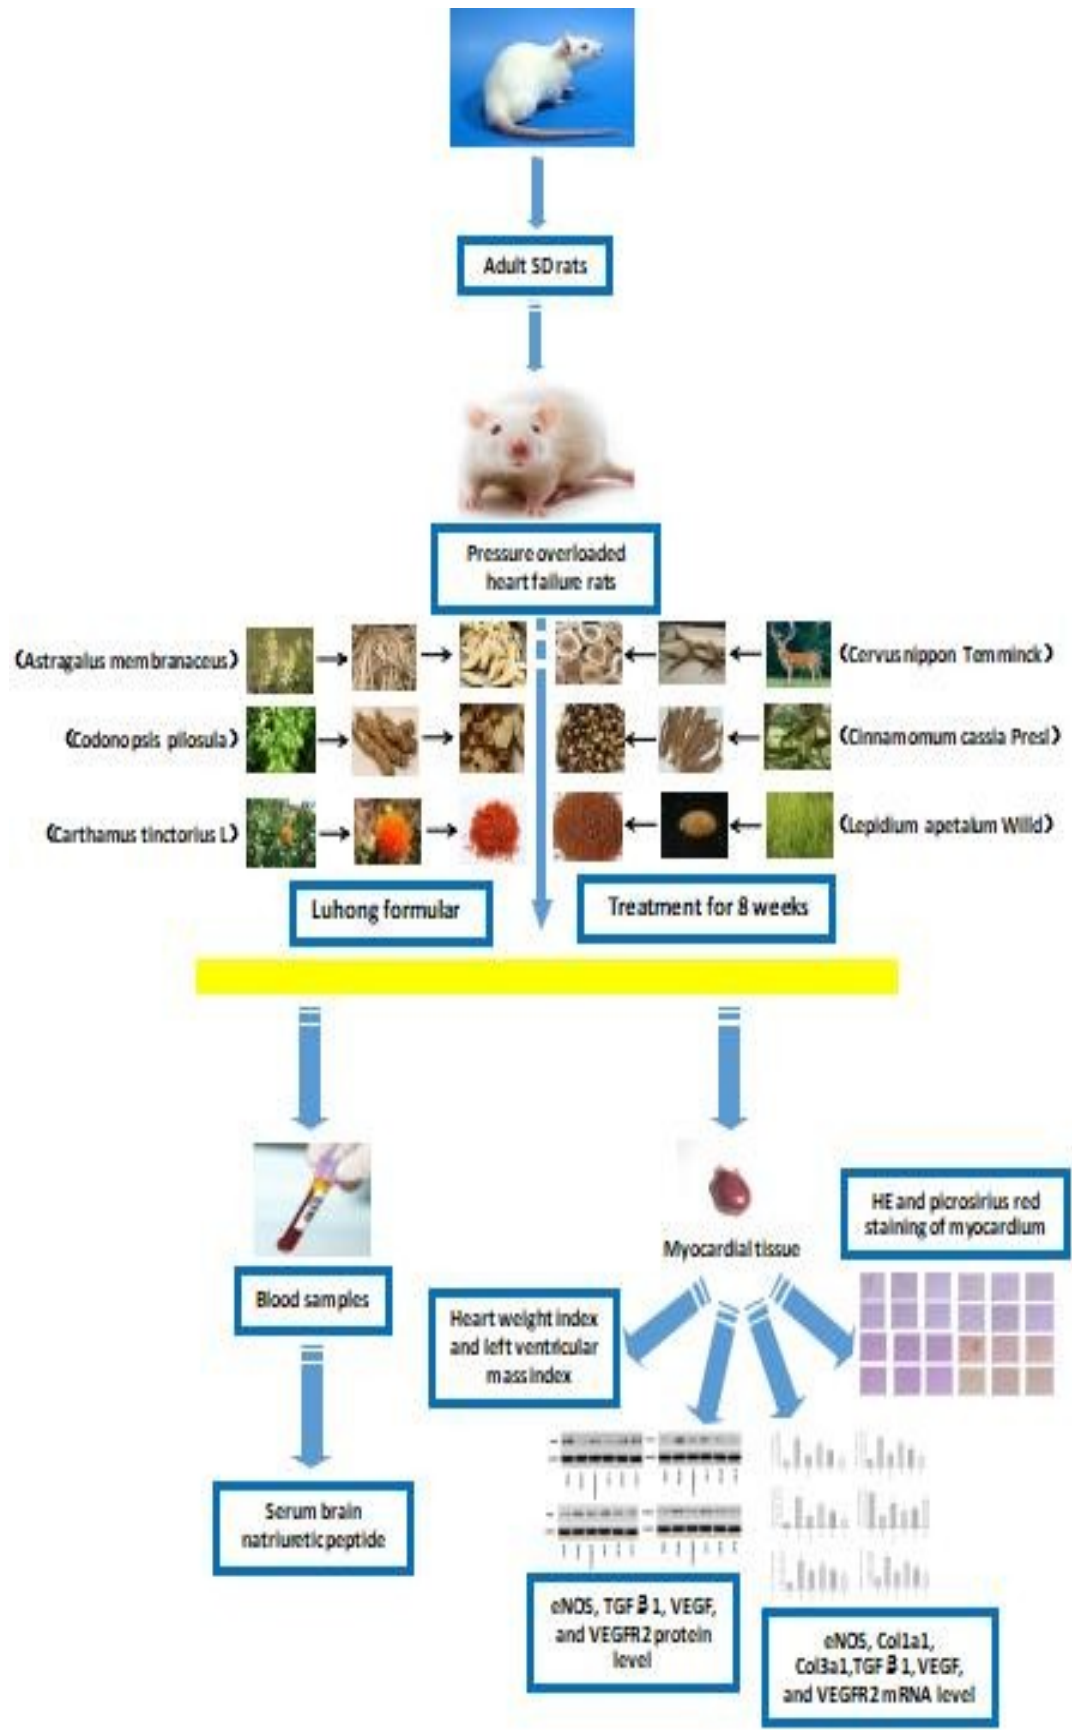

Supplement: f1 [file 4095967.f1.pdf]
